# Supplementary material for: Sensitivity of chemical weathering and dissolved carbon dynamics to hydrological conditions in a typical karst river
Source: PubMed Central journal article supplement (PMC5318914; doi:10.1038/srep42944), 2017-02-21
Supplement: srep42944-s1.pdf [file srep42944-s1.pdf]

## Supplementary Information *for*

# Sensitivity of chemical weathering and dissolved carbon dynamics to hydrological conditions in a typical karst river

**Authors:** Jun Zhong, Si-liang Li\*, Faxiang Tao, Fujun Yue, & Cong-Qiang Liu

\*Si-Liang Li ([siliang.li@tju.edu.cn](mailto:siliang.li@tju.edu.cn))

### Contents:

1. Supplementary tables
  - 1.1. Supplementary Table S1
  - 1.2. Supplementary Table S2
2. Supplementary figures
  - 2.1. Supplementary Figures S1
  - 2.2. Supplementary Figures S2
  - 2.3. Supplementary Figures S3
  - 2.4. Supplementary Figures S4
  - 2.5. Supplementary Figures S5
3. Supplementary Equations
4. Supplementary References

# 1. Supplementary Tables:

1.1 Supplementary Table S1

| Sample Number | Time     | EC (μS/cm) | pH   | Alk (mmol/L) | Cl <sup>-</sup> (ppm) | NO <sub>3</sub> <sup>-</sup> (ppm) | SO <sub>4</sub> <sup>2-</sup> (ppm) | Ca <sup>2+</sup> (ppm) | K <sup>+</sup> (ppm) | Mg <sup>2+</sup> (ppm) | Na <sup>+</sup> (ppm) | SiO <sub>2</sub> (ppm) | TDS (mg/L) | NICB (100%) |
|---------------|----------|------------|------|--------------|-----------------------|------------------------------------|-------------------------------------|------------------------|----------------------|------------------------|-----------------------|------------------------|------------|-------------|
| W1            | 11/23/13 | 365        | 7.93 | 2.49         | 8.9                   | 9.8                                | 60.6                                | 62.9                   | 1.7                  | 9.5                    | 7.4                   | 4.5                    | 306        | 1.9         |
| W2            | 12/24/13 | 366        | 7.98 | 2.58         | 8.1                   | 13.4                               | 60.1                                | 62.6                   | 2.0                  | 10.7                   | 7.7                   | 4.8                    | 312        | 1.8         |
| W3            | 01/15/14 | 397        | 7.99 | 2.62         | 7.8                   | 12.5                               | 66.0                                | 63.9                   | 2.2                  | 11.8                   | 7.5                   | 4.8                    | 323        | 1.9         |
| W4            | 02/17/14 | 407        | 8.07 | 2.74         | 10.4                  | 13.5                               | 66.6                                | 70.1                   | 1.9                  | 12.1                   | 8.3                   | 4.2                    | 339        | 3.2         |
| W5            | 03/25/13 | 380        | 8.05 | 2.67         | 11.1                  | 15.1                               | 80.1                                | 71.0                   | 2.5                  | 13.9                   | 10.8                  | 4.7                    | 356        | 3.6         |
| W6            | 04/18/14 | 340        | 8.09 | 2.46         | 8.5                   | 0.7                                | 45.2                                | 53.3                   | 1.6                  | 9.8                    | 6.5                   | 5.0                    | 278        | 2.4         |
| W7            | 05/22/14 | 351        | 8.13 | 2.54         | 5.5                   | 9.6                                | 50.2                                | 57.0                   | 1.8                  | 10.8                   | 5.1                   | 5.5                    | 289        | 1.9         |
| W8            | 06/19/14 | 385        | 8.13 | 2.48         | 5.6                   | 6.7                                | 50.3                                | 58.2                   | 1.9                  | 10.6                   | 5.1                   | 5.5                    | 287        | 3.9         |
| W9            | 06/21/14 | 381        | 8.18 | 2.48         | 4.5                   | 9.1                                | 52.3                                | 57.2                   | 2.0                  | 12.5                   | 3.3                   | 6.3                    | 287        | 3.6         |
| W10           | 06/22/14 | 357        | 8.14 | 2.39         | 4.6                   | 12.0                               | 43.3                                | 56.0                   | 1.8                  | 9.9                    | 4.0                   | 5.4                    | 269        | 3.5         |
| W11           | 06/23/14 | 364        | 8.15 | 2.37         | 4.5                   | 11.4                               | 40.0                                | 52.3                   | 1.6                  | 9.5                    | 3.7                   | 5.2                    | 260        | 1.8         |
| W12           | 06/24/14 | 345        | 8.17 | 2.38         | 5.0                   | 7.4                                | 45.5                                | 56.5                   | 1.8                  | 10.1                   | 4.6                   | 5.1                    | 272        | 4.8         |
| W13           | 06/26/14 | 384        | 8.16 | 2.36         | 4.7                   | 10.9                               | 40.2                                | 52.2                   | 1.5                  | 9.9                    | 3.7                   | 5.2                    | 260        | 2.2         |
| W14           | 06/29/14 | 354        | 8.15 | 2.44         | 5.2                   | 2.6                                | 42.9                                | 54.7                   | 1.7                  | 9.7                    | 4.4                   | 4.9                    | 271        | 3.9         |
| W15           | 07/02/14 | 344        | 8.15 | 2.46         | 4.9                   | 2.7                                | 41.7                                | 54.2                   | 1.7                  | 9.3                    | 4.3                   | 5.2                    | 269        | 3.3         |
| W16           | 07/03/14 | 336        | 8.20 | 2.35         | 4.2                   | 5.3                                | 38.4                                | 53.5                   | 1.4                  | 9.0                    | 3.2                   | 5.0                    | 256        | 4.1         |
| W17           | 07/04/14 | 341        | 8.25 | 2.48         | 4.3                   | 8.0                                | 39.0                                | 53.7                   | 1.6                  | 8.9                    | 3.5                   | 5.2                    | 265        | 1.7         |
| W18           | 07/05/14 | 344        | 8.26 | 2.38         | 4.1                   | 10.1                               | 36.6                                | 49.3                   | 1.4                  | 8.4                    | 3.3                   | 5.0                    | 251        | -0.4        |
| W19           | 07/06/14 | 357        | 8.26 | 2.39         | 4.7                   | 11.4                               | 42.7                                | 55.1                   | 1.7                  | 9.6                    | 4.0                   | 5.1                    | 266        | 2.0         |
| W20           | 07/07/14 | 358        | 8.30 | 2.35         | 4.7                   | 8.5                                | 43.4                                | 53.3                   | 1.7                  | 10.0                   | 4.0                   | 5.0                    | 263        | 3.3         |
| W21           | 07/12/14 | 350        | 8.28 | 2.40         | 4.7                   | 3.1                                | 41.5                                | 52.0                   | 1.6                  | 9.4                    | 3.8                   | 5.1                    | 262        | 2.6         |
| W22           | 07/13/14 | 342        | 8.24 | 2.35         | 4.3                   | 10.6                               | 38.7                                | 51.4                   | 1.6                  | 8.8                    | 3.6                   | 5.2                    | 254        | 1.3         |
| W23           | 07/14/14 | 332        | 8.19 | 2.31         | 3.6                   | 6.6                                | 32.1                                | 46.4                   | 1.5                  | 8.0                    | 3.1                   | 4.7                    | 239        | 0           |
| W24           | 07/15/14 | 315        | 8.20 | 2.33         | 3.5                   | 10.2                               | 33.5                                | 51.3                   | 1.5                  | 8.2                    | 3.4                   | 5.4                    | 247        | 2.7         |
| W25           | 07/16/14 | 323        | 8.22 | 2.36         | 3.8                   | 7.7                                | 35.5                                | 50.6                   | 1.5                  | 8.6                    | 2.9                   | 5.3                    | 250        | 1.8         |
| W26           | 07/17/14 | 355        | 8.22 | 2.41         | 4.1                   | 6.5                                | 38.4                                | 52.4                   | 1.5                  | 9.2                    | 3.2                   | 5.4                    | 259        | 2.4         |
| W27           | 07/18/14 | 361        | 8.21 | 2.41         | 4.5                   | 11.5                               | 46.2                                | 52.5                   | 1.5                  | 9.7                    | 4.0                   | 5.3                    | 268        | 0           |
| W28           | 07/19/14 | 340        | 8.21 | 2.33         | 4.2                   | 11.9                               | 43.1                                | 53.0                   | 1.4                  | 9.5                    | 3.7                   | 5.5                    | 261        | 2.1         |
| W29           | 07/20/14 | 342        | 8.27 | 2.29         | 4.2                   | 11.4                               | 43.0                                | 52.9                   | 1.7                  | 9.4                    | 3.5                   | 5.5                    | 258        | 2.4         |
| W30           | 07/21/14 | 335        | 8.19 | 2.33         | 4.1                   | 3.0                                | 42.6                                | 52.5                   | 1.7                  | 9.4                    | 3.5                   | 5.7                    | 259        | 3.6         |
| W31           | 08/12/14 | 388        | 8.19 | 2.54         | 5.4                   | 13.2                               | 55.8                                | 56.7                   | 2.1                  | 11.5                   | 5.1                   | 4.8                    | 294        | 0.6         |
| W32           | 09/13/14 | 345        | 8.19 | 2.59         | 3.9                   | 11.7                               | 49.7                                | 55.0                   | 1.9                  | 10.0                   | 4.3                   | 5.3                    | 285        | -0.7        |
| W33           | 10/13/14 | 399        | 8.16 | 2.57         | 4.7                   | 14.6                               | 69.4                                | 58.6                   | 2.4                  | 11.2                   | 6.0                   | 4.9                    | 312        | -2.0        |
| W34           | 10/25/14 | 326        | 8.12 | 2.57         | 5.2                   | 14.0                               | 65.4                                | 59.4                   | 2.0                  | 10.4                   | 5.5                   | 4.8                    | 307        | -1.7        |

Supplementary Table S1: Full dataset on hydrochemical characteristics on Wujiang River from November 2013 to October 2014.  $NICB = (TZ^+ - TZ^-) \times 100\% / (TZ^+ + TZ^-)$

## 1.2 Supplementary Table S2

| Sample | DOC   | DIC      | $\delta^{13}\text{C}_{\text{DIC}}$ | $\text{H}_2\text{CO}_3$ | $\text{HCO}_3^-$ | $\text{CO}_3^{2-}$ | $p\text{CO}_2$      | S <sub>IC</sub> | F <sub>DIC</sub> | F <sub>DOC</sub> | F <sub>sil</sub> | F <sub>carb</sub> | DIC <sub>bio</sub> | DIC <sub>geo</sub> |
|--------|-------|----------|------------------------------------|-------------------------|------------------|--------------------|---------------------|-----------------|------------------|------------------|------------------|-------------------|--------------------|--------------------|
| Number | (ppm) | (mmol/L) | (‰)                                | (mmol/L)                | (mmol/L)         | (mmol/L)           | ( $\mu\text{atm}$ ) |                 | (mol/L)          | (mg/L)           | (kg/L)           | (kg/L)            | (mmol/L)           | (mmol/L)           |
| W1     | 0.89  | 2.55     | -10.6                              | 0.07                    | 2.47             | 0.010              | 1595                | 0.45            | 2.38             | 0.83             | 9.8              | 60.1              | 1.20               | 1.36               |
| W2     | 0.98  | 2.63     | -10.2                              | 0.06                    | 2.56             | 0.014              | 1619                | 0.69            | 1.72             | 0.64             | 8.3              | 42.4              | 1.19               | 1.45               |
| W3     | 1.05  | 2.68     | -9.8                               | 0.07                    | 2.60             | 0.011              | 1372                | 0.54            | 1.52             | 0.60             | 7.4              | 38.0              | 1.17               | 1.52               |
| W4     | 1.28  | 2.78     | -10.1                              | 0.05                    | 2.71             | 0.018              | 1403                | 0.84            | 0.98             | 0.45             | 3.7              | 26.1              | 1.25               | 1.53               |
| W5     | 1.32  | 2.72     | -9.4                               | 0.06                    | 2.65             | 0.014              | 1215                | 0.65            | 1.17             | 0.56             | 6.5              | 32.3              | 1.13               | 1.59               |
| W6     | 1.02  | 2.49     | -10.7                              | 0.04                    | 2.43             | 0.017              | 1202                | 0.72            | 5.43             | 2.23             | 21.7             | 121               | 1.18               | 1.31               |
| W7     | 1.15  | 2.57     | -11.3                              | 0.04                    | 2.51             | 0.017              | 1025                | 0.69            | 6.36             | 2.84             | 28.9             | 148               | 1.29               | 1.28               |
| W8     | 1.26  | 2.51     | -12.5                              | 0.04                    | 2.45             | 0.019              | 1096                | 0.79            | 6.12             | 3.08             | 28.7             | 148               | 1.39               | 1.12               |
| W9     | 1.17  | 2.51     | -12.3                              | 0.04                    | 2.45             | 0.020              | 1024                | 0.81            | 10.3             | 4.81             | 46.3             | 255               | 1.36               | 1.15               |
| W10    | 1.01  | 2.41     | -12.6                              | 0.04                    | 2.36             | 0.018              | 1031                | 0.78            | 8.78             | 3.68             | 38.9             | 212               | 1.34               | 1.07               |
| W11    | 0.97  | 2.40     | -12.7                              | 0.04                    | 2.34             | 0.018              | 1000                | 0.76            | 7.02             | 2.85             | 29.0             | 159               | 1.35               | 1.05               |
| W12    | 0.97  | 2.40     | -12.3                              | 0.04                    | 2.35             | 0.019              | 969                 | 0.80            | 5.62             | 2.28             | 25.4             | 138               | 1.31               | 1.09               |
| W13    | 1.02  | 2.39     | -11.8                              | 0.04                    | 2.33             | 0.017              | 903                 | 0.69            | 5.59             | 2.38             | 22.3             | 128               | 1.25               | 1.14               |
| W14    | 0.94  | 2.47     | -12.6                              | 0.04                    | 2.41             | 0.019              | 1050                | 0.78            | 4.37             | 1.66             | 17.9             | 101               | 1.38               | 1.09               |
| W15    | 1.03  | 2.49     | -12.7                              | 0.04                    | 2.43             | 0.019              | 1058                | 0.78            | 5.12             | 2.12             | 21.6             | 115               | 1.40               | 1.09               |
| W16    | 1.03  | 2.37     | -13.8                              | 0.03                    | 2.31             | 0.020              | 885                 | 0.81            | 6.51             | 2.84             | 24.2             | 152               | 1.44               | 0.92               |
| W17    | 1.01  | 2.49     | -13.5                              | 0.03                    | 2.44             | 0.024              | 831                 | 0.89            | 18.4             | 7.46             | 71.8             | 408               | 1.49               | 1.00               |
| W18    | 0.97  | 2.39     | -12.1                              | 0.03                    | 2.34             | 0.023              | 791                 | 0.84            | 12.1             | 4.89             | 45.5             | 256               | 1.28               | 1.11               |
| W19    | 1.04  | 2.40     | -12.6                              | 0.03                    | 2.35             | 0.024              | 791                 | 0.88            | 9.14             | 3.94             | 38.9             | 217               | 1.34               | 1.07               |
| W20    | 1.05  | 2.36     | -12.1                              | 0.03                    | 2.30             | 0.025              | 711                 | 0.90            | 6.10             | 2.72             | 26.0             | 144               | 1.26               | 1.09               |
| W21    | 1.04  | 2.41     | -12.8                              | 0.03                    | 2.36             | 0.025              | 762                 | 0.88            | 2.87             | 1.24             | 11.4             | 64.3              | 1.37               | 1.04               |
| W22    | 1.05  | 2.36     | -11.6                              | 0.03                    | 2.31             | 0.022              | 815                 | 0.83            | 8.57             | 3.80             | 35.5             | 192               | 1.21               | 1.15               |
| W23    | 0.97  | 2.34     | -11.6                              | 0.03                    | 2.28             | 0.018              | 860                 | 0.69            | 6.26             | 2.59             | 24.0             | 127               | 1.20               | 1.14               |
| W24    | 0.94  | 2.35     | -12.7                              | 0.03                    | 2.29             | 0.019              | 843                 | 0.74            | 12.0             | 4.81             | 52.3             | 267               | 1.32               | 1.03               |
| W25    | 1.04  | 2.38     | -12.8                              | 0.03                    | 2.32             | 0.021              | 848                 | 0.81            | 23.8             | 10.4             | 91.3             | 521               | 1.35               | 1.03               |
| W26    | 1.08  | 2.43     | -13.1                              | 0.03                    | 2.38             | 0.022              | 880                 | 0.83            | 36.7             | 16.4             | 142              | 822               | 1.41               | 1.02               |
| W27    | 1.14  | 2.43     | -14.8                              | 0.03                    | 2.37             | 0.021              | 898                 | 0.82            | 34.2             | 16.1             | 140              | 773               | 1.59               | 0.84               |
| W28    | 1.17  | 2.35     | -14.2                              | 0.03                    | 2.30             | 0.020              | 865                 | 0.81            | 27.7             | 13.8             | 119              | 652               | 1.47               | 0.88               |
| W29    | 1.13  | 2.30     | -13.9                              | 0.03                    | 2.25             | 0.023              | 733                 | 0.86            | 12.0             | 5.93             | 53.9             | 286               | 1.42               | 0.89               |
| W30    | 1.22  | 2.35     | -12.2                              | 0.03                    | 2.30             | 0.018              | 862                 | 0.73            | 7.97             | 4.14             | 35.5             | 184               | 1.27               | 1.08               |
| W31    | 1.13  | 2.56     | -12.2                              | 0.04                    | 2.50             | 0.021              | 949                 | 0.83            | 6.32             | 2.80             | 28.8             | 148               | 1.38               | 1.18               |
| W32    | 0.99  | 2.60     | -13.4                              | 0.03                    | 2.54             | 0.027              | 768                 | 0.93            | 5.68             | 2.17             | 25.9             | 125               | 1.53               | 1.06               |
| W33    | 1.04  | 2.59     | -11.5                              | 0.04                    | 2.53             | 0.021              | 1059                | 0.83            | 2.83             | 1.14             | 15.4             | 66.1              | 1.31               | 1.28               |
| W34    | 0.90  | 2.60     | -10.4                              | 0.04                    | 2.54             | 0.018              | 1118                | 0.77            | 1.55             | 0.54             | 7.2              | 36.7              | 1.20               | 1.40               |

Supplementary Table S2: Full dataset on dissolved carbon characteristics, chemical weathering rates and DIC sources on Wujiang River from November 2013 to October 2014.

## 2. Figures:

### 2.1. Supplementary figure S1

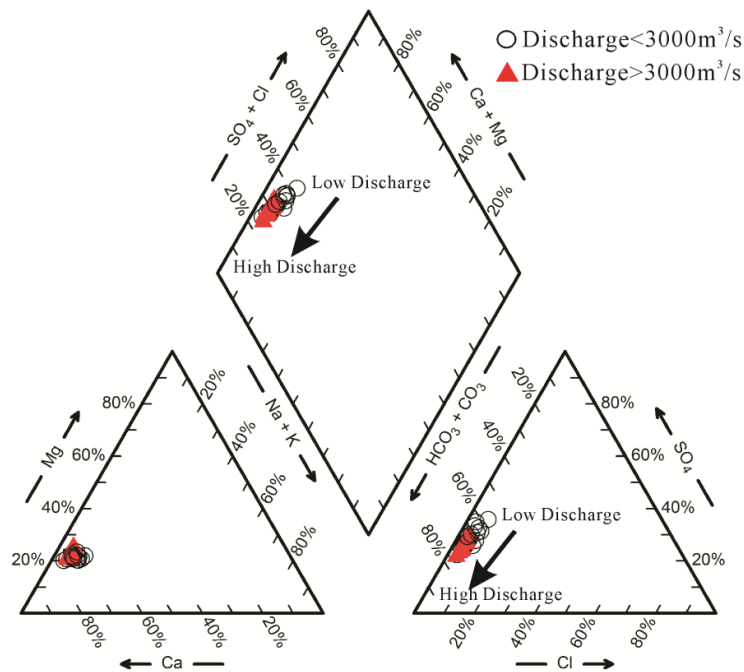

Figure S1. Piper diagram for surface water samples collected in Wujiang River. Figure was produced using AqQa (<https://www.rockware.com/product/overview.php?id=150>).

### 2.2. Supplementary figure S2

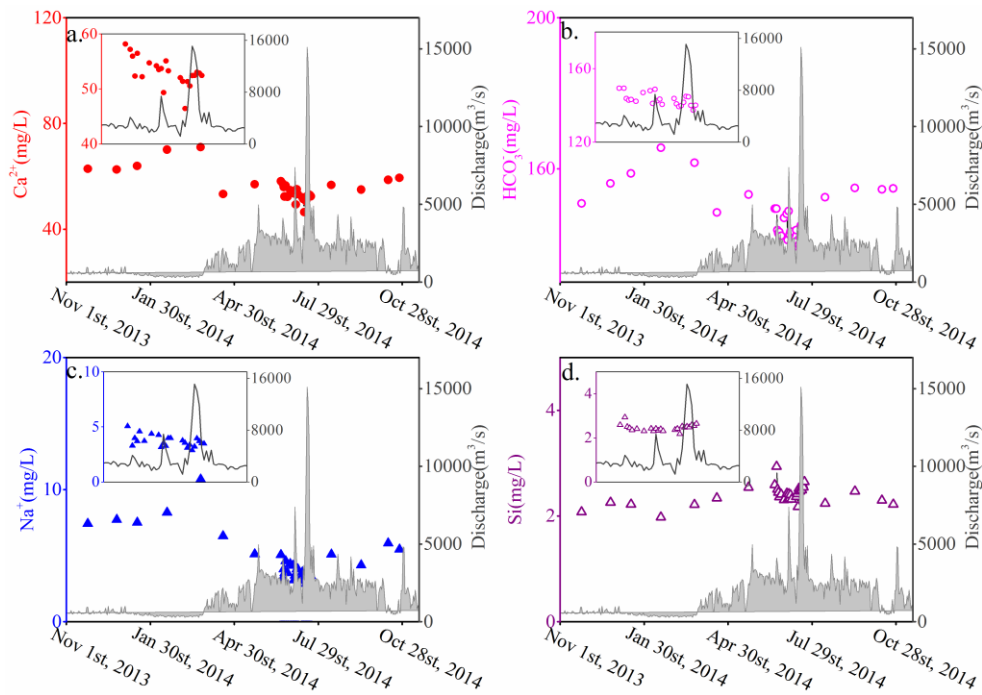

Figure S2. Temporal variations of daily discharge (solid line) and concentrations of  $\text{Ca}^{2+}$ ,  $\text{HCO}_3^-$ ,  $\text{Na}^+$  and  $\text{SiO}_2$  for the Wujiang River between November 2013 and October 2014, and detailed picture showing the temporal variations in the monsoon season.

2.3. Supplementary figure S3

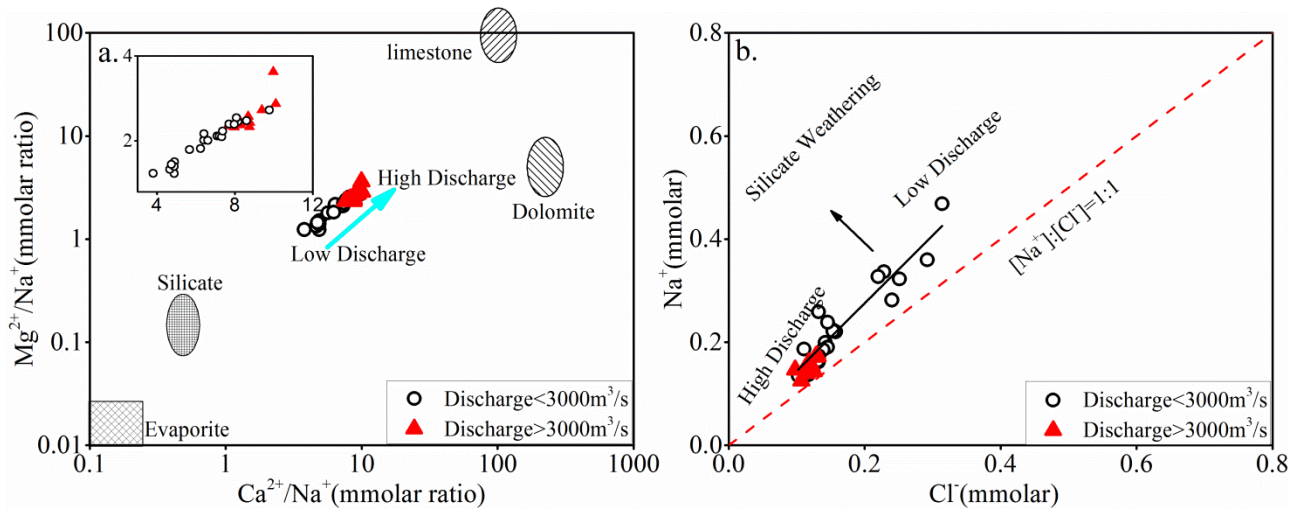

Figure S3. a. Plots of  $\text{Mg}^{2+}/\text{Na}^+$  versus  $\text{Ca}^{2+}/\text{Na}^+$  ratios for the Wujiang River. The endmembers are from Han and Liu<sup>1</sup>. b.  $\text{Na}^+$  plots against  $\text{Cl}^-$ .

2.4. Supplementary figure S4

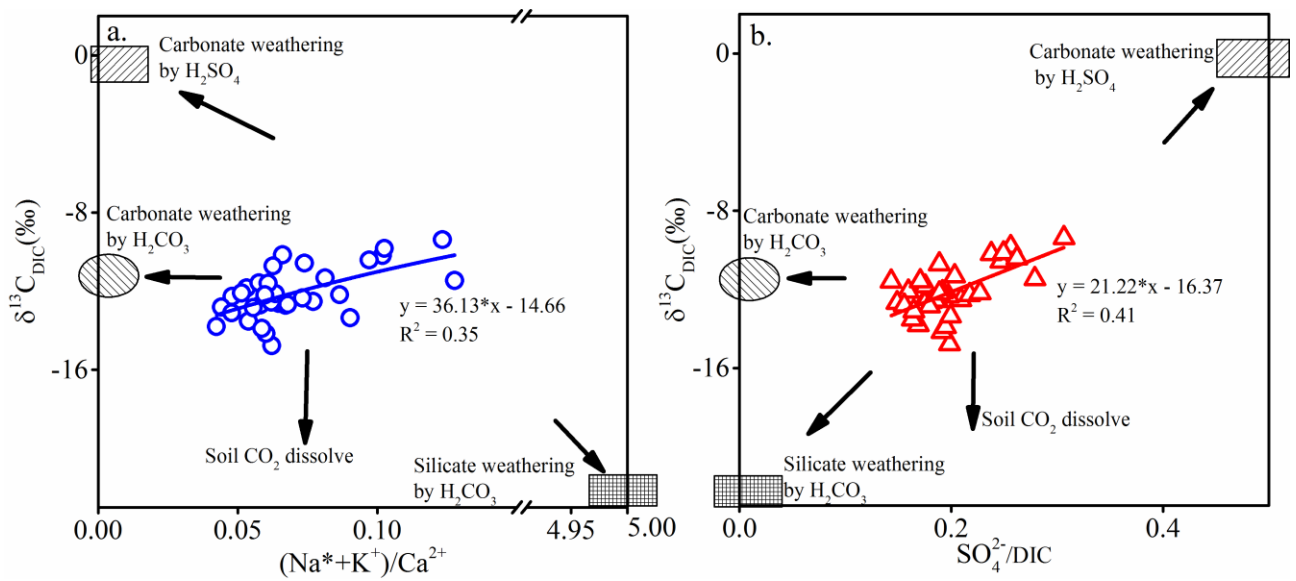

Figure S4. a. Correlation between  $(\text{Na}^* + \text{K}^+)/\text{Ca}^{2+}$  and  $\delta^{13}\text{C}_{\text{DIC}}$ . b. Correlation between  $\text{SO}_4^{2-}/\text{DIC}$  and discharge.

2.5. Supplementary figure S5

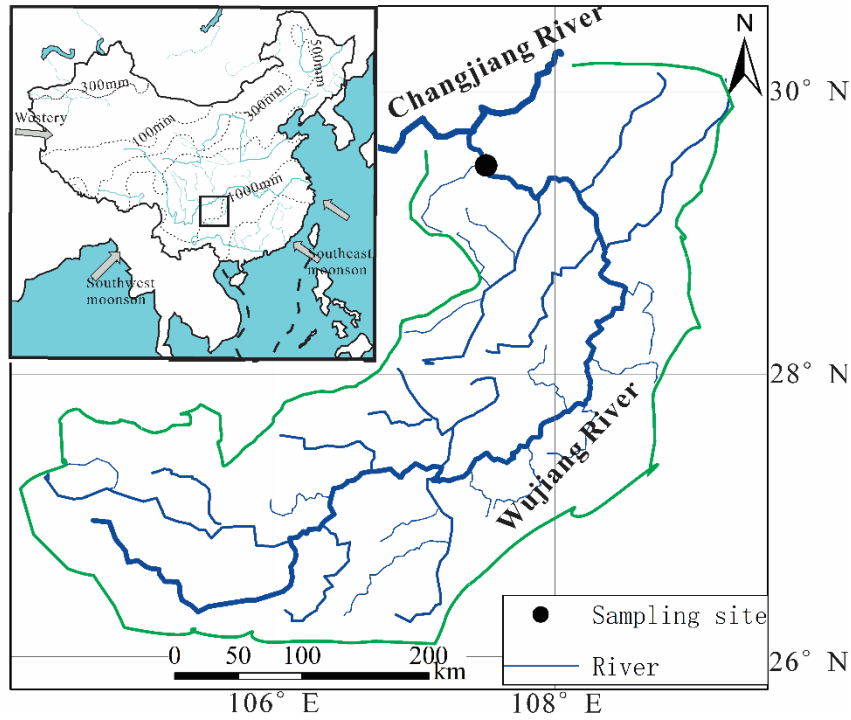

Figure S5. Map showing the sampling site of the Wujiang River. This figure was drawn by software CoreDraw X7 (<http://www.corel.com/cn/>).

### 3. Equations

The local CO<sub>2</sub> partial pressure ( $p\text{CO}_2$ ) can be estimated by taking into account the effect of elevation<sup>3,4</sup>:

$$P_z = P_0 \exp(-Z/H) \quad (\text{S1})$$

Forward model:

The mass balance equation in the forward model for element X in riverine water can be expressed as follows Han and Liu<sup>1</sup>, Li, et al.<sup>5</sup>, Galy<sup>6</sup> and Fan, et al.<sup>7</sup>.

$$[X]_{\text{river}} = [X]_{\text{atmosphere}} + [X]_{\text{carbonate}} + [X]_{\text{silicate}} + [X]_{\text{anthropogenic}} \quad (\text{S2})$$

$$[\text{Cl}^-]_{\text{atmosphere}} = 0.027 \text{ mmol/L} \quad (\text{S3})$$

$$[\text{Cl}^-]_{\text{river}} = [\text{Cl}^-]_{\text{atmosphere}} + [\text{Cl}^-]_{\text{anthropogenic}} \quad (\text{S4})$$

$$[\text{Na}^+]_{\text{river}} = [\text{Cl}^-]_{\text{river}} + [\text{Na}^+]_{\text{silicate}} \quad (\text{S5})$$

$$[\text{K}^+]_{\text{river}} = [\text{K}^+]_{\text{silicate}} \quad (\text{S6})$$

$$[\text{Ca}^{2+}]_{\text{river}} = [\text{Ca}^{2+}]_{\text{carbonate}} + [\text{Ca}^{2+}]_{\text{silicate}} \quad (\text{S7})$$

$$[\text{Mg}^{2+}]_{\text{river}} = [\text{Mg}^{2+}]_{\text{carbonate}} + [\text{Mg}^{2+}]_{\text{silicate}} \quad (\text{S8})$$

$$[\text{Mg/K}]_{\text{silicate}} = 2 \quad (\text{S9})$$

$$[\text{Ca/Na}]_{\text{silicate}} = 0.2 \quad (\text{S10})$$

$$F_{\text{Carb}} = ([\text{Ca}^{2+}]_{\text{Carb}} \times M_{\text{Ca}} + [\text{Mg}^{2+}]_{\text{Carb}} \times M_{\text{Mg}}) \times \text{Discharge} \quad (\text{S11})$$

$$F_{\text{Sil}} = ([\text{Ca}^{2+}]_{\text{Sil}} \times M_{\text{Ca}} + [\text{Mg}^{2+}]_{\text{Sil}} \times M_{\text{Mg}} + [\text{Na}^+]_{\text{Sil}} \times M_{\text{Na}} + [\text{K}^+]_{\text{Sil}} \times M_{\text{K}} + [\text{Si}] \times M_{\text{SiO}_2}) \times \text{Discharge} \quad (\text{S12})$$

Where M refers to the molar mass, the subscript Carb, Sil represents major ions of carbonate and silicate weathering sources, respectively.

#### 4. References:

- 1 Han, G. & Liu, C.-Q. Water geochemistry controlled by carbonate dissolution: a study of the river waters draining karst-dominated terrain, Guizhou Province, China. *Chemical Geology* **204**, 1-21, doi:10.1016/j.chemgeo.2003.09.009 (2004).
- 2 Wu, L., Huh, Y., Qin, J., Du, G. & van Der Lee, S. Chemical weathering in the Upper Huang He (Yellow River) draining the eastern Qinghai-Tibet Plateau. *Geochimica et Cosmochimica Acta* **69**, 5279-5294, doi:10.1016/j.gca.2005.07.001 (2005).
- 3 Moon, S., Huh, Y., Qin, J. & Vanpho, N. Chemical weathering in the Hong (Red) River basin: Rates of silicate weathering and their controlling factors. *Geochimica et Cosmochimica Acta* **71**, 1411-1430, doi:10.1016/j.gca.2006.12.004 (2007).
- 4 Li, S. *et al.* Major element chemistry in the upper Yangtze River: A case study of the Longchuanjiang River. *Geomorphology* **129**, 29-42, doi:10.1016/j.geomorph.2011.01.010 (2011).
- 5 Galy, A. F.-L., C. Weathering processes in the Ganges–Brahmaputra basin and the riverine alkalinity budget. *Chemical Geology* **159** (1999).
- 6 Fan, B.-L. *et al.* Characteristics of carbonate, evaporite and silicate weathering in Huanghe River basin: A comparison among the upstream, midstream and downstream. *Journal of Asian Earth Sciences* **96**, 17-26, doi:10.1016/j.jseaes.2014.09.005 (2014).
